# Supplementary material for: Synergy between Membrane Currents Prevents Severe Bradycardia in Mouse Sinoatrial Node Tissue
Source: MDPI journal article supplement (doi:10.3390/ijms24065786), 2023-03-17
Supplement: s1 [file s1]

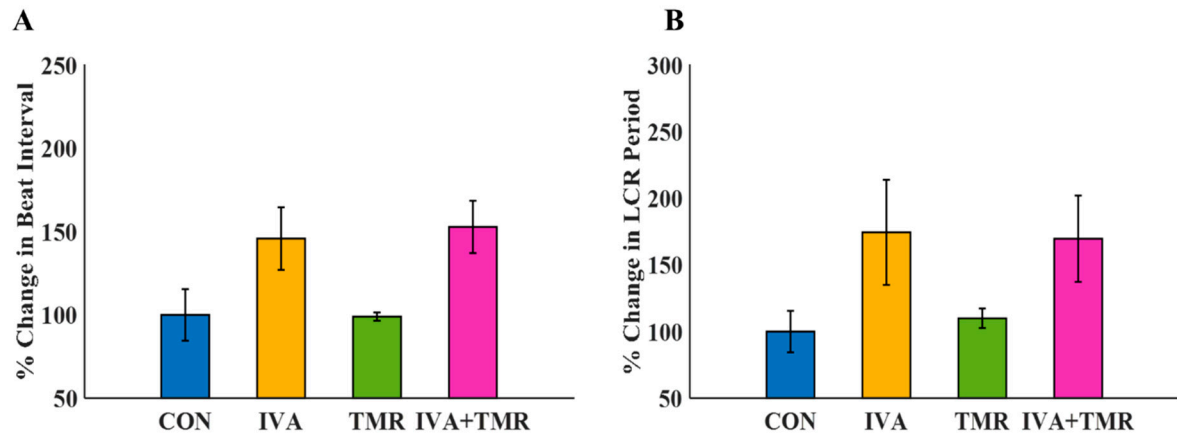

**Figure S1. Administration of 0.1 $\mu$ M tetramethrin (TMR) did not lead to a significant change in sinoatrial node function.** Percent change from control in (A) beat interval (BI) and (B) local Ca<sup>2+</sup> release (LCR) period in control (blue), and after administration of 3 $\mu$ M ivabradine (IVA, yellow, N=6), 0.1 $\mu$ M TMR (green, N=6) and both IVA and TMR (pink, N=6). \* p<0.05 vs. control.

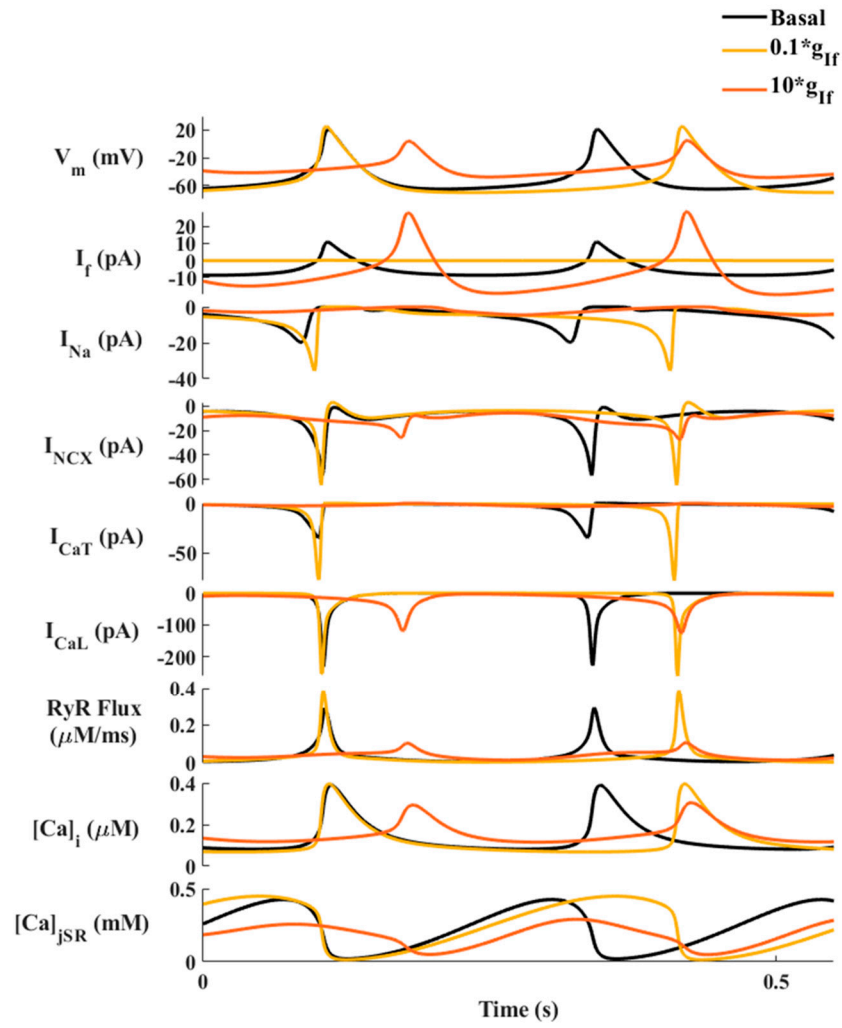

**Figure S2. A simulated increase of “funny” current ( $I_f$ ) leads to a decrease in sodium current ( $I_{Na}$ ).** The coupled-clock function of a sinoatrial node cell in the basal state (black), with 10% (yellow) and with 1000% (red) of the  $I_f$  maximal conductance coefficient. Top to bottom: Membrane voltage ( $V_m$ ),  $I_f$ ,  $I_{Na}$ ,  $Na^+$ - $Ca^{2+}$  exchanger current ( $I_{NCX}$ ), T-type  $Ca^{2+}$  current ( $I_{CaT}$ ), L-type  $Ca^{2+}$  current ( $I_{CaL}$ ), the flux of  $Ca^{2+}$  exiting the SR (RyR flux), intracellular  $Ca^{2+}$  concentration ( $[Ca]_i$ ) and  $Ca^{2+}$  concentration in the junctional SR compartment ( $[Ca]_{jSR}$ ).

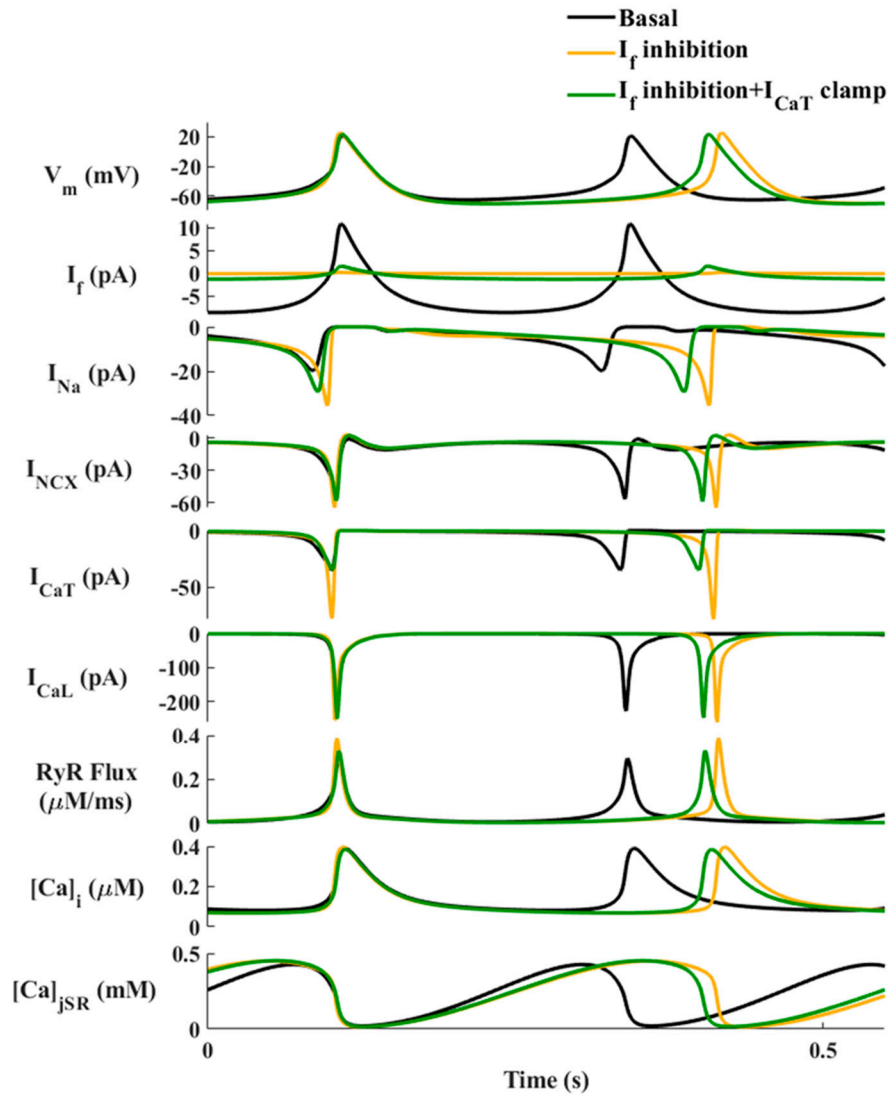

**Figure S3. Simulated ‘current clamp’ of T-type  $\text{Ca}^{2+}$  current ( $I_{\text{CaT}}$ ) slightly subsided the increase in sodium current ( $I_{\text{Na}}$ ) caused by a reduction in “funny” current ( $I_f$ ).** The coupled-clock function of a sinoatrial node cell in the basal state (black), in response to  $I_f$  blockade (IVA, yellow), and in response to  $I_f$  blockade with the fixation of  $I_{\text{CaT}}$  to its basal value (IVA+ $I_{\text{CaT}}$  clamp, green). Top to bottom: Membrane voltage ( $V_m$ ),  $I_f$ ,  $I_{\text{Na}}$ ,  $\text{Na}^+$ - $\text{Ca}^{2+}$  exchanger current ( $I_{\text{NCX}}$ ),  $I_{\text{CaT}}$ , L-type  $\text{Ca}^{2+}$  current ( $I_{\text{CaL}}$ ), the flux of  $\text{Ca}^{2+}$  exiting the SR (RyR Flux), intracellular  $\text{Ca}^{2+}$  concentration ( $[\text{Ca}]_i$ ) and  $\text{Ca}^{2+}$  concentration in the junctional SR compartment ( $[\text{Ca}]_{\text{jSR}}$ ).

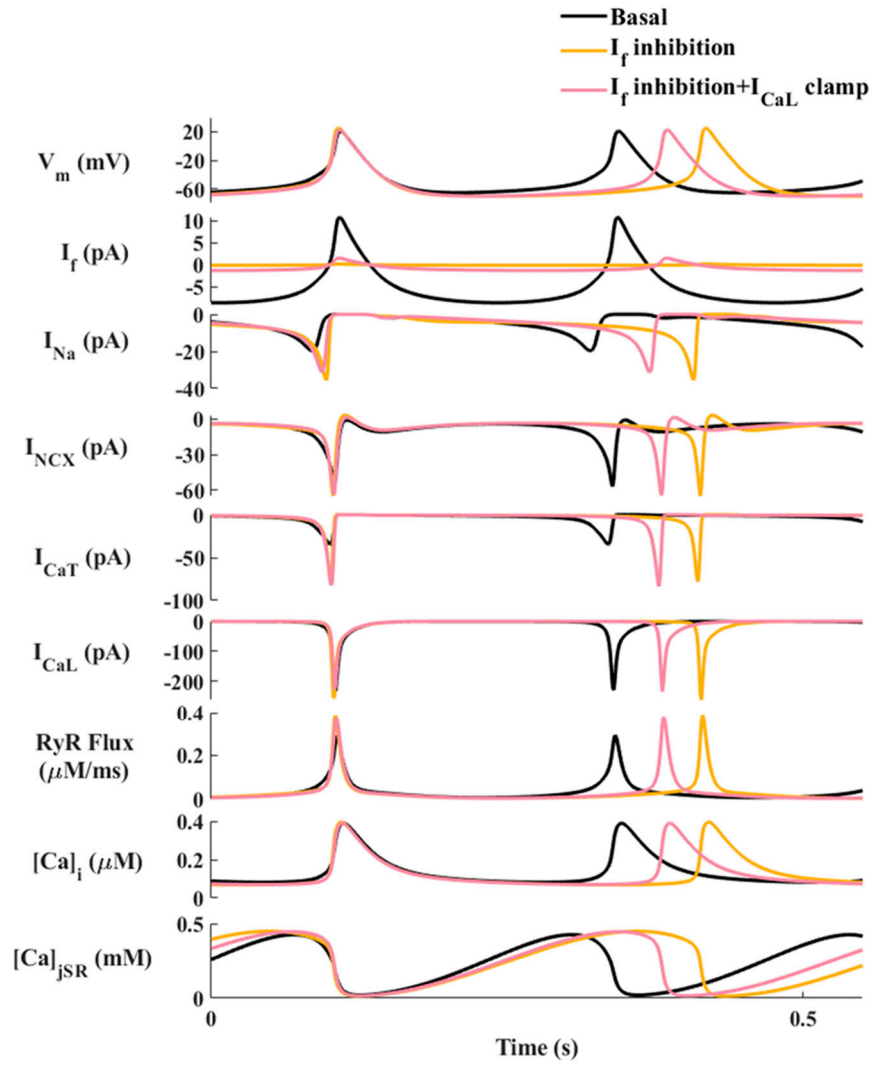

**Figure S4. Simulated 'current clamp' of L-type  $\text{Ca}^{2+}$  current ( $I_{\text{CaL}}$ ) slightly subsided the increase in sodium current ( $I_{\text{Na}}$ ) caused by a reduction in "funny" current ( $I_f$ ). The coupled-clock function of a sinoatrial node cell in the basal state (black), in response to  $I_f$  blockade (IVA, yellow), and in response to  $I_f$  blockade with the fixation of  $I_{\text{CaL}}$  to its basal value (IVA+ $I_{\text{CaL}}$  clamp, pink). Top to bottom: Membrane voltage ( $V_m$ ),  $I_f$ ,  $I_{\text{Na}}$ ,  $\text{Na}^+$ - $\text{Ca}^{2+}$  exchanger current ( $I_{\text{NCX}}$ ),  $I_{\text{CaT}}$ , L-type  $\text{Ca}^{2+}$  current ( $I_{\text{CaL}}$ ), the flux of  $\text{Ca}^{2+}$  exiting the SR (RyR Flux), intracellular  $\text{Ca}^{2+}$  concentration ( $[\text{Ca}]_i$ ) and  $\text{Ca}^{2+}$  concentration in the junctional SR compartment ( $[\text{Ca}]_{\text{jSR}}$ ).**

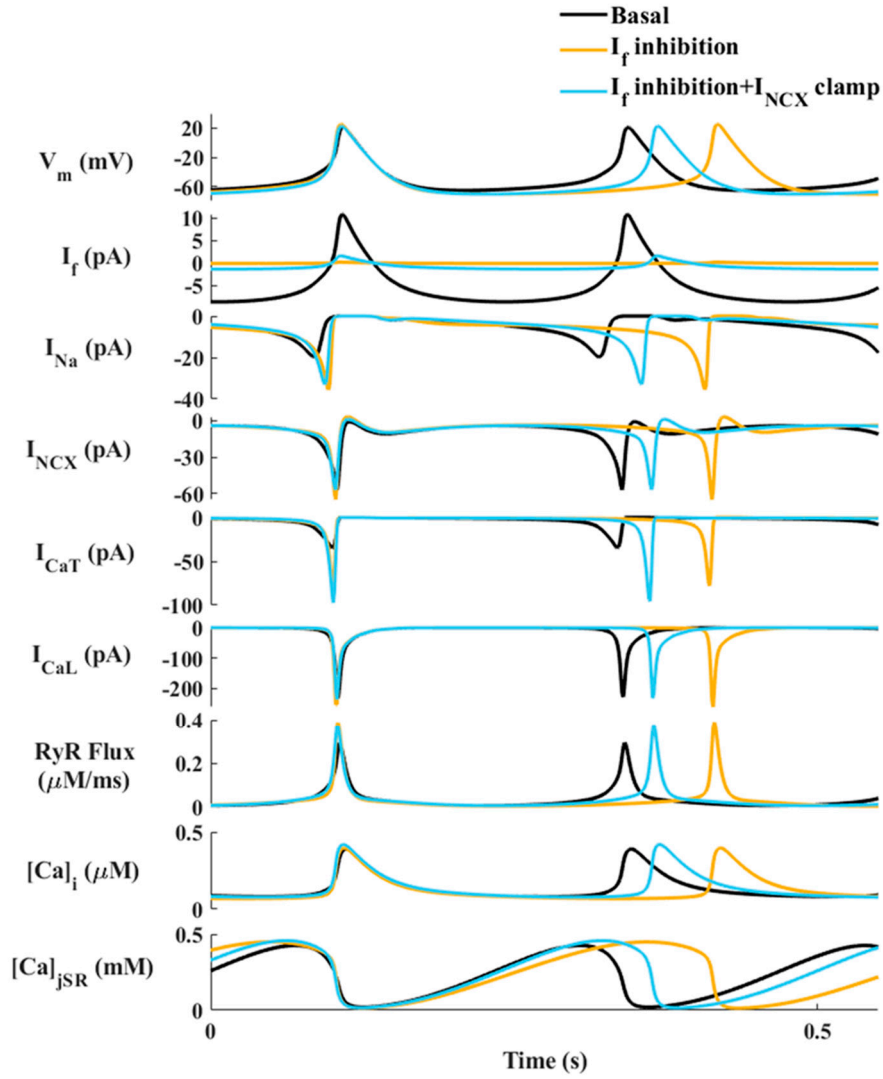

**Figure S5. A simulated ‘current clamp’ of  $Na^+$ - $Ca^{2+}$  exchanger current ( $I_{NCX}$ ) did not restrain the increase in sodium current ( $I_{Na}$ ) caused by a reduction in “funny” current ( $I_f$ ).** The coupled-clock function of a sinoatrial node cell in the basal state (black), in response to  $I_f$  blockade (IVA, yellow), and in response to  $I_f$  blockade with the fixation of  $I_{NCX}$  to its basal value (IVA+ $I_{NCX}$  clamp, light blue). Top to bottom: Membrane voltage ( $V_m$ ),  $I_f$ ,  $I_{Na}$ ,  $I_{NCX}$ , T-type  $Ca^{2+}$  current ( $I_{CaT}$ ), L-type  $Ca^{2+}$  current ( $I_{CaL}$ ), the flux of  $Ca^{2+}$  exiting the SR (RyR flux), intracellular  $Ca^{2+}$  concentration ( $[Ca]_i$ ) and  $Ca^{2+}$  concentration in the junctional SR compartment ( $[Ca]_{jSR}$ ).

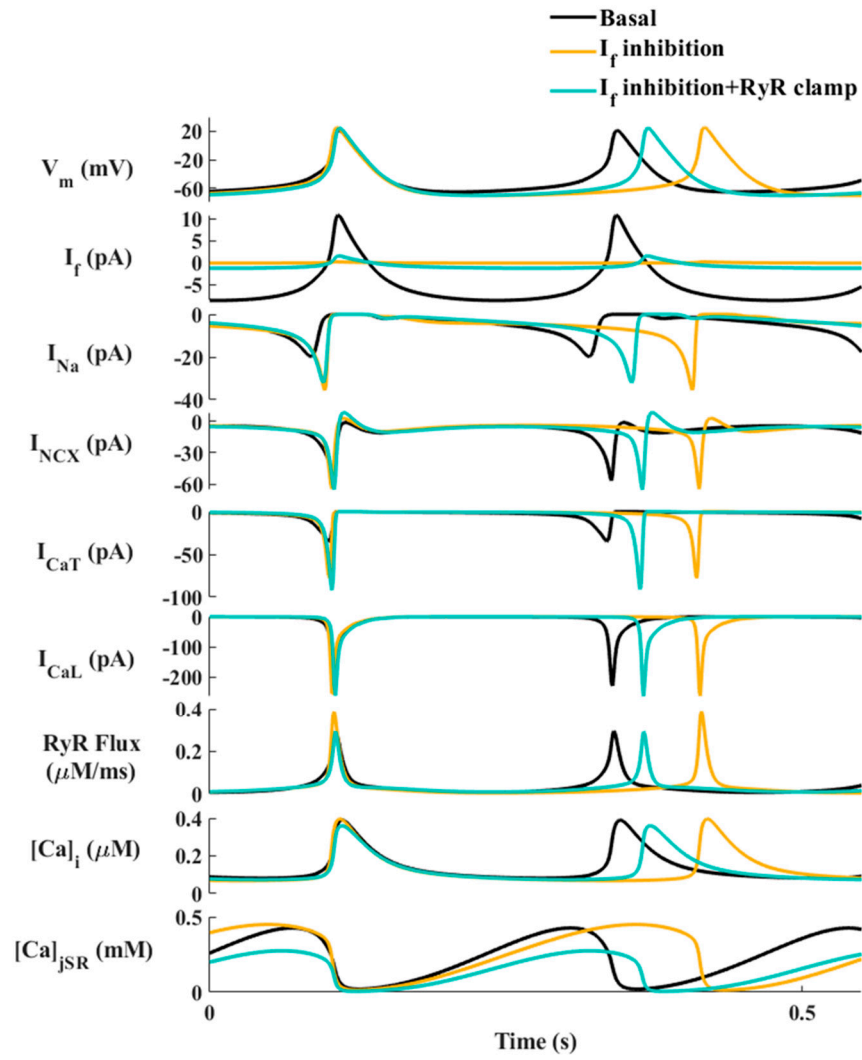

**Figure S6. A simulated 'current clamp' of ryanodine receptor (RyR) did not restrain the increase in sodium current ( $I_{Na}$ ) caused by a reduction in "funny" current ( $I_f$ ).** The coupled-clock function of a sinoatrial node cell in the basal state (black), in response to  $I_f$  blockade (IVA, yellow), and in response to  $I_f$  blockade with the fixation of RyR to its basal value (IVA+RyR clamp, turquoise). Top to bottom: Membrane voltage ( $V_m$ ),  $I_f$ ,  $I_{Na}$ , Na<sup>+</sup>-Ca<sup>2+</sup> exchanger current ( $I_{NCX}$ ), T-type Ca<sup>2+</sup> current ( $I_{CaT}$ ), L-type Ca<sup>2+</sup> current ( $I_{CaL}$ ), the flux of Ca<sup>2+</sup> exiting the SR (RyR Flux), intracellular Ca<sup>2+</sup> concentration ( $[Ca]_i$ ) and Ca<sup>2+</sup> concentration in the junctional SR compartment ( $[Ca]_{jSR}$ ).
