# Supplementary material for: Synergy between Membrane Currents Prevents Severe Bradycardia in Mouse Sinoatrial Node Tissue
Source: MDPI journal article supplement (doi:10.3390/ijms24065786), 2023-03-17
Supplement: s1 [file s1]

---

## Supplementary Materials

This model is based on our published model [1], which itself based on previous publications [2–11].

### 1. Model Equations

#### 1.1. General

##### 1.1.1. Membrane potential

$$I_f = I_{fNa} + I_{fK}$$

$$I_b = I_{bNa} + I_{bCa} + I_{bK}$$

$$I_{Na} = I_{Na11} + I_{Na15}$$

$$I = I_f + I_{Na} + I_{CaL} + I_{CaT} + I_{Kr} + I_{Ks} + I_{to} + I_{sus} + I_{K1} + I_{st} + I_{NaK} + I_{NCX} + I_b + I_{KACh}$$

$$dV/dt = -(1/C) \cdot I$$

##### 1.1.2. Gating variables (For any gating variable $g$ with steady state $g_\infty$ )

$$dg/dt = (g_\infty - g)/\tau_g$$

##### 1.1.3. Reversal potential

$$E_{Na} = E_T \cdot \log ([Na^+]_o/[Na^+]_i)$$

$$E_K = E_T \cdot \log ([K^+]_o/[K^+]_i)$$

$$E_{Ks} = E_T \cdot \log (([K^+]_o + 0.12 \cdot [Na^+]_o)/([K^+]_i + 0.12 \cdot [Na^+]_i))$$

$$E_{Ca} = (E_T/2) \cdot \log ([Ca^{2+}]_o/[Ca^{2+}]_{sub})$$

#### 1.2. AC-cAMP-PKA signaling

##### 1.2.1. cAMP activity

$$\frac{d[cAMP]}{dt} = (k_{iso} \cdot [ATP] + k_1 \cdot [ATP] - k_2 \cdot [cAMP] - k_3 \cdot [cAMP] - k_{cch} \cdot [ATP])/60000$$

$$k_{iso} = 0.1599 \cdot \frac{[ISO]^{1.5}}{76.5441^{0.6238} + [ISO]^{1.5}}$$

$$k_{ibmx} = -0.8730 \cdot \frac{[IBMX]^{0.8395}}{4.0550^{0.8781} + [IBMX]^{0.8395}} + 1$$

$$k_{cch} = 0.0146 \cdot \frac{[CCh]^{1.4402}}{51.7331^{1.4402} + [CCh]^{1.4402}}$$

$$k_1 = K_{AC,I} + \frac{K_{AC}}{1 + \exp \left( (K_{Ca} - k_{bCM} \cdot \frac{f_{CMi}}{k_{fCM} \cdot (1 - f_{CMi})}) / K_{AC,Ca} \right)}$$

$$k_2 = k_{ibmx} \cdot 265.3512 \cdot \frac{[cAMP]^{5.7343}}{24.7290^{6.7343} + [cAMP]^{6.7343}}$$

$$k_3 = k_{PKA} \cdot \frac{[cAMP]^{(n_{PKA}-1)}}{k_{PKA,cAMP}^{n_{PKA}} + [cAMP]^{n_{PKA}}}$$

##### 1.2.2. PLB activity

$$\frac{d[PLB_p]}{dt} = (k_4 - k_5)/60000$$

$$k_4 = (k_{PLB_p} \cdot [PKA]^{n_{PLB}})/(k_{PKA,PLB}^{n_{PLB}} + [PKA]^{n_{PLB}})$$

$$k_5 = k_{PP1} \cdot \frac{[PP1]}{k_{PP1,PLB} + [PLB_p]}$$

##### 1.2.3. PKA activity

$$[PKA] = 2 - [RC] - [ARC] - [A_2RC] - [PKA_{PKI}]$$

$$[A_2R] = [PKA] + [PKA_{PKI}]$$

$$[A_2RC] = [PKA] \cdot [A_2R]/0.009$$

$$[ARC] = 0.008 \cdot [A_2RC]/[cAMP]$$

$$[PKA_{PKI}] = [PKI_{tot}] \cdot [PKA]/(0.001 + [PKA])$$

$$[RC] = 0.008 \cdot \frac{[ARC]}{[cAMP]}$$

#### 1.3. Membrane currents

### 1.3.1. 4-aminopyridine-sensitive currents, $I_{4AP} = I_{to} + I_{sus}$

$$I_{to} = g_{to} \cdot (V_m - E_K) \cdot q \cdot r$$

$$I_{sus} = g_{sus} \cdot (V_m - E_K) \cdot r$$

$$q_{\infty} = 1/(1 + \exp((V_m + 49.0)/13.0))$$

$$r_{\infty} = 1/(1 + \exp(-(V_m - 19.3)/15.0))$$

$$\tau_q = (6.06 + 39.102/(0.57 \cdot \exp(-0.08 \cdot (V_m + 44.0)) + 0.065 \cdot \exp(0.1 \cdot (V_m + 45.93))))/0.67$$

$$\tau_r = (2.75 + 14.40516/(1.037 \cdot \exp(0.09 \cdot (V_m + 30.61)) + 0.369 \cdot \exp(-0.12 \cdot (V_m + 23.84))))/0.303$$

### 1.3.2. Calcium background current, $I_{bCa}$

$$I_{bCa} = g_{bCa} \cdot (V_m - E_{Ca})$$

### 1.3.3. Potassium background current, $I_{bK}$

$$I_{bK} = g_{bK} \cdot (V_m - E_K)$$

### 1.3.4. Sodium-dependent background current, $I_{bNa}$

$$I_{bNa} = g_{bNa} \cdot (V_m - E_{Na})$$

### 1.3.5. L-type calcium current, $I_{CaL}$

$$b_{CaL} = -0.2152 + 1.6913 \cdot PKA^{10.0808} / (0.8836^{10.0808} + PKA^{10.0808})$$

$$I_{CaL12} = g_{CaL12} \cdot (1 + b_{CaL}) \cdot (V_m - E_{CaL}) \cdot d_{L12} \cdot f_{L12} \cdot f_{Ca}$$

$$I_{CaL13} = g_{CaL13} \cdot (1 + b_{CaL}) \cdot (V_m - E_{CaL}) \cdot d_{L13} \cdot f_{L13} \cdot f_{Ca}$$

$$I_{CaL} = I_{CaL12} + I_{CaL13}$$

$$d_{\infty 12} = 1/(1 + \exp(-(V_m + 3.0)/5.0))$$

$$f_{\infty 12} = 1/(1 + \exp((V_m + 36.0)/4.6))$$

$$d_{\infty 13} = 1/(1 + \exp(-(V_m + 13.5)/6))$$

$$f_{\infty 13} = 1/(1 + \exp((V_m + 35.0)/7.3))$$

$$f_{Ca\infty} = K_{mfCa} / (K_{mfCa} + Ca_{sub})$$

$$\alpha_{dL} = -28.39 \cdot (V_m + 35) / (\exp(-(V_m + 35)/2.5) - 1) - 84.9 \cdot V_m / (\exp(-0.208 \cdot V_m) - 1)$$

$$\beta_{dL} = 11.43 \cdot (V_m - 5.0) / (\exp(0.4 \cdot (V_m - 5.0)) - 1)$$

$$\tau_{dL} = 2000 / (\alpha_{dL} + \beta_{dL})$$

$$\tau_{fl} = (7.4 + 45.77 \cdot \exp(-0.5 \cdot (V_m + 28.1) \cdot (V_m + 28.1) / (11 \cdot 11)))$$

$$\tau_{fCa} = f_{Ca\infty} / \alpha_{fCa}$$

### 1.3.6. T-type calcium current, $I_{CaT}$

$$I_{CaT} = g_{CaT} \cdot (V_m - E_{CaT}) \cdot d_T \cdot f_T$$

$$d_{T\infty} = 1/(1 + \exp(-(V_m + 26)/6))$$

$$f_{T\infty} = 1/(1 + \exp((V_m + 61.7)/5.6))$$

$$\tau_{dT} = 1/(1.068 \cdot \exp((V_m + 26.3)/30) + 1.068 \cdot \exp(-(V_m + 26.3)/30))$$

$$\tau_{fT} = 1/(0.0153 \cdot \exp(-(V_m + 61.7)/83.3) + 0.015 \cdot \exp((V_m + 61.7)/15.38))$$

### 1.3.7. Hyperpolarization activated “funny” current (HCN4), $I_f$

$$I_{fNa} = 0.3833 \cdot g_{If} \cdot (V_m - E_{Na}) \cdot y$$

$$I_{fK} = 0.6167 \cdot g_{If} \cdot (V_m - E_K) \cdot y$$

$$K_{if} = 25.3403, K_{0.5if} = 18.1115, n_{if} = 9.2453$$

$$V_{shift} = K_{if} \cdot [cAMP]^{n_{if}} / (K_{0.5if}^{n_{if}} + [cAMP]^{n_{if}}) - 18.1040$$

$$y_{\infty} = 1/(1 + \exp((V_m + 104.2 - V_{shift})/16.3))$$

$$\tau_y = 1.5049 / (\exp(-(V_m + 590.3) \cdot 0.01094) + \exp((V_m - 85.1)/17.2))$$

For  $I_f$  inhibition (ivabradine) simulation we used:  $g_{If\_IVA} = 0.1 \cdot g_{If}$

### 1.3.8. Inward rectifier potassium current, $I_{K1}$

$$I_{K1} = g_{K1} \cdot 1/(1 + \exp(0.070727 \cdot (V_m - E_K))) \cdot (K_0 / ([K^+]_o + 0.228880)) \cdot (V_m - E_K)$$

### 1.3.9. Rapidly-activated delayed rectifier potassium current, $I_{Kr}$

$$I_{Kr} = g_{Kr} \cdot (V_m - E_K) \cdot p_a \cdot p_i$$

$$p_{a\infty} = 1/(1 + \exp(-(V_m + 21.173694)/9.757086))$$

$$p_{i\infty} = 1/(1 + \exp((V_m + 20.758474 - 4.0)/(19.0)))$$

$$\tau_{pa} = 0.699821 / (0.003596 \cdot \exp(V_m/15.339290) + 0.000177 \cdot \exp(-(V_m)/25.868423))$$

$$\tau_{pi} = 0.2 + 0.9 \cdot 1.0 / (0.1 \cdot \exp(V_m/54.645) + 0.656 \cdot \exp(V_m/106.157))$$

### 1.3.10. Slowly-activating delayed rectifier potassium current, $I_{Ks}$

$$I_{Ks} = g_{Ks} \cdot (V_m - E_{Ks}) \cdot xs^2$$

$$xs_{\infty} = 1/(1 + \exp(-(V_m - 20.876040)/11.852723))$$

$$\tau_{xs} = 1000/(13.097938/(1 + \exp(-(V_m - 48.910584)/10.630272)) + \exp(-V_m/35.316539))$$

### 1.3.11. Sodium currents, $I_{Na}=I_{Na11}+I_{Na15}$

$$FNa = (9.52e - 02 \cdot \exp(-6.3e - 2 \cdot (V_m + 34.4))/(1 + 1.66 \cdot \exp(-0.225 \cdot (V_m + 63.7)))) + 8.69e - 2$$

$$hs_{11} = (1 - FNa) \cdot h_{11} + FNa \cdot j_{11}$$

$$hs_{15} = (1 - FNa) \cdot h_{15} + FNa \cdot j_{15}$$

$$I_{Na11} = g_{Na11} \cdot m_{11}^3 \cdot hs_{11} \cdot V_m \cdot [Na]_0 \cdot F/(E_T \cdot 1000) \cdot (\exp((V_m - E_{Na})/E_T) - 1)/(\exp(V_m/E_T) - 1)$$

$$I_{Na15} = g_{Na15} \cdot m_{15}^3 \cdot hs_{15} \cdot V_m \cdot [Na]_0 \cdot F/(E_T \cdot 1000) \cdot (\exp((V_m - E_{Na15})/E_T) - 1)/(\exp(V_m/E_T) - 1)$$

$$I_{Na} = I_{Na11} + I_{Na15}$$

$$m_{11,\infty} = 1/(1 + \exp(-(V_m + 36.097331 - 5.0)/5.0))^{(1/3)}$$

$$h_{11,\infty} = 1/(1 + \exp((V_m + 56.0)/3.0))$$

$$j_{11,\infty} = h_{11,\infty}$$

$$m_{15,\infty} = 1/(1 + \exp(-(V_m + 45.213705)/7.219547))^{(1/3)}$$

$$h_{15,\infty} = 1/(1 + \exp(-(V_m + 62.578120)/(-6.084036)))$$

$$j_{15,\infty} = h_{15,\infty}$$

$$\tau_{m11} = 1000 \cdot (((0.6247e - 03/(0.832 \cdot \exp(-0.335 \cdot (V_m + 56.7))) + 0.627 \cdot \exp(0.082 \cdot (V_m + 65.01)))) + 0.0000492)$$

$$\tau_{h11} = 1000.0 \cdot (((3.717e - 06 \cdot \exp(-0.2815 \cdot (V_m + 17.11)))/(1 + 0.003732 \cdot \exp(-0.3426 \cdot (V_m + 37.76)))) + 0.0005977)$$

$$\tau_{j11} = 1000 \cdot (((0.00000003186 \cdot \exp(-0.6219 \cdot (V_m + 18.8)))/(1 + 0.00007189 \cdot \exp(-0.6683 \cdot (V_m + 34.07)))) + 0.003556)$$

$$\tau_{m15} = \tau_{m11}, \tau_{h15} = \tau_{h11}, \tau_{j15} = \tau_{j11}$$

For  $I_{Na}$  block (tetrodotoxin) simulation we used:

$$g_{Na11\_TTX} = 0.8 \cdot g_{Na11}$$

$$g_{Na15\_TTX} = 0.5 \cdot g_{Na15}$$

### 1.3.12. Sodium-potassium pump current, $I_{NaK}$

$$I_{NaK} = I_{NaKmax} \cdot ((([K^+]_o)^{1.2})/((K_{mK})^{1.2} + ([K^+]_o)^{1.2})) \cdot ((([Na^+]_i)^{1.3})/((K_{mNa})^{1.3} + ([Na^+]_i)^{1.3}))/((1.0 + \exp(-(V_m - E_{Na} + 120)/30)))$$

### 1.3.13. Sodium-calcium exchanger current, $I_{NCX}$

$$d_0 = 1 + ([Ca^{2+}]_o/K_{co}) \cdot (1 + \exp(Q_{co} \cdot V_m/E_T)) + ([Na^+]_o/K_{1no}) \cdot (1 + ([Na^+]_o/K_{2no}) \cdot (1 + [Na^+]_o/K_{3no}))$$

$$k_{43} = [Na^+]_i/(K_{3ni} + [Na^+]_i)$$

$$k_{41} = \exp(-Q_n \cdot V_m/(2 \cdot E_T))$$

$$k_{34} = [Na^+]_o/(K_{3no} + [Na^+]_o)$$

$$k_{21} = ([Ca^{2+}]_o/K_{co}) \cdot \exp(Q_{co} \cdot V_m/E_T)/d_0;$$

$$k_{23} = ([Na^+]_o/K_{1no}) \cdot ([Na^+]_o/K_{2no}) \cdot (1 + [Na^+]_o/K_{3no}) \cdot \exp(-Q_n \cdot V_m/(2 \cdot E_T))/d_0$$

$$k_{32} = \exp(Q_n \cdot V_m/(2 \cdot E_T))$$

$$x_1 = k_{34} \cdot k_{41} \cdot (k_{23} + k_{21}) + k_{21} \cdot k_{32} \cdot (k_{43} + k_{41})$$

$$d_i = 1 + ([Ca^{2+}]_{sub}/K_{ci}) \cdot (1 + \exp(-Q_{ci} \cdot V_m/E_T) + [Na^+]_i/K_{cni}) + ([Na^+]_i/K_{1ni}) \cdot (1 + ([Na^+]_i/K_{2ni}) \cdot (1 + [Na^+]_i/K_{3ni}))$$

$$k_{12} = ([Ca^{2+}]_{sub}/K_{ci}) \cdot \exp(-Q_{ci} \cdot V_m/E_T)/d_i$$

$$k_{14} = ([Na^+]_i/K_{1ni}) \cdot ([Na^+]_i/K_{2ni}) \cdot (1 + [Na^+]_i/K_{3ni}) \cdot \exp(Q_n \cdot V_m/(2 \cdot E_T))/d_i$$

$$x_2 = k_{43} \cdot k_{32} \cdot (k_{14} + k_{12}) + k_{41} \cdot k_{12} \cdot (k_{34} + k_{32})$$

$$x_3 = k_{43} \cdot k_{14} \cdot (k_{23} + k_{21}) + k_{12} \cdot k_{23} \cdot (k_{43} + k_{41})$$

$$x_4 = k_{34} \cdot k_{23} \cdot (k_{14} + k_{12}) + k_{21} \cdot k_{14} \cdot (k_{34} + k_{32})$$

$$I_{NCX} = K_{NaCa} \cdot (k_{21} \cdot x_2 - k_{12} \cdot x_1)/(x_1 + x_2 + x_3 + x_4)$$

### 1.3.14. Sustained inward current, $I_{st}$

$$I_{st} = g_{st} \cdot (V_m - E_{st}) \cdot q_a \cdot q_i$$

$$q_{a,\infty} = 1/(1 + \exp(-(V_m + 67)/5))$$

$$\begin{aligned}
\alpha_{qa} &= 1/(0.15 \cdot \exp(-V_m/11) + 0.2 \cdot \exp(-V_m/700)) \\
\beta_{qa} &= 1/(16 \cdot \exp(V_m/8) + 15 \cdot \exp(V_m/50)) \\
\tau_{qa} &= 1/(\alpha_{qa} + \beta_{qa}) \\
\alpha_{qi} &= 0.15 \cdot 1/(3100 \cdot \exp((V_m + 10)/13) + 700.3 \cdot \exp((V_m + 10)/70)) \\
\beta_{qi} &= 0.15 \cdot 1/(95.7 \cdot \exp(-(V_m + 10)/10) + 50 \cdot \exp(-(V_m + 10)/700)) + 0.000229/(1 \\
&\quad + \exp(-(V_m + 10)/5)) \\
q_{i,\infty} &= \alpha_{qi}/(\alpha_{qi} + \beta_{qi}) \\
\tau_{qi} &= 1/(\alpha_{qi} + \beta_{qi})
\end{aligned}$$

### 1.3.15. Acetylcholine-activated potassium current, $I_{KACH}$

$$\begin{aligned}
I_{KACH} &= C_m \cdot g_{KACH} \cdot (V_m - E_K) \\
\beta_w &= 0.001 \cdot 12.32/(1 + 0.0042/([CCh] \cdot 10^{-6})) \\
\alpha_w &= 0.001 \cdot 17 \cdot \exp(0.0133 \cdot (V_m + 40)) \\
w_\infty &= \beta_w/(\alpha_w + \beta_w) \\
\tau_w &= 1/(\alpha_w + \beta_w)
\end{aligned}$$

### 1.4. Sarcoplasmic reticulum calcium cycling

#### 1.4.1. Ryanodine receptor function

$$\begin{aligned}
j_{SRCarel} &= k_s \cdot OO \cdot ([Ca^{2+}]_{jSR} - [Ca^{2+}]_{sub}) \\
k_{oCa} &= k_{oCa\_max} \cdot \left( RyR_{min} - \frac{RyR_{max} \cdot PKA^{n_{RyR}}}{k_{05Ry}^{n_{RyR}} + PKA^{n_{RyR}}} + 1 \right) \\
k_{CaSR} &= MaxSR - (MaxSR - MinSR)/(1 + (EC_{50SR}/[Ca^{2+}]_{jSR})^{HSR}) \\
k_{oSRCa} &= k_{oCa}/k_{CaSR} \\
k_{iSRCa} &= k_{iCa} \cdot k_{CaSR} \\
dR/dt &= (k_{im} \cdot RI - k_{iSRCa} \cdot [Ca^{2+}]_{sub} \cdot R) - (k_{oSRCa} \cdot [Ca^{2+}]_{sub}^2 \cdot R - k_{om} \cdot OO) \\
dOO/dt &= (k_{oSRCa} \cdot [Ca^{2+}]_{sub}^2 \cdot R - k_{om} \cdot OO) - (k_{iSRCa} \cdot [Ca^{2+}]_{sub} \cdot OO - k_{im} \cdot S) \\
dS/dt &= (k_{iSRCa} \cdot [Ca^{2+}]_{sub} \cdot OO - k_{im} \cdot S) - (k_{om} \cdot S - k_{oSRCa} \cdot [Ca^{2+}]_{sub}^2 \cdot RI) \\
dRI/dt &= (k_{om} \cdot S - k_{oSRCa} \cdot [Ca^{2+}]_{sub}^2 \cdot RI) - (k_{im} \cdot RI - k_{iSRCa} \cdot [Ca^{2+}]_{sub} \cdot R)
\end{aligned}$$

#### 1.4.2. The rate of calcium uptake (pumping) by the SR, $j_{up}$

$$\begin{aligned}
f([PLB_p]) &= 2.9102 \cdot \frac{[PLB_p]^{9.5517}}{0.2763^{9.5517} + [PLB_p]^{9.5517}} + 0.4998 \\
j_{up} &= P_{up,basal} \cdot f([PLB_p])/[1 + K_{up}/[Ca^{2+}]_i].
\end{aligned}$$

#### 1.4.3. Calcium diffusion flux from submembrane space to myoplasm, $j_{Ca,diff}$

$$j_{Caddiff} = ([Ca^{2+}]_{sub} - [Ca^{2+}]_i)/\tau_{difCa}$$

#### 1.4.4. Calcium flux between network and junctional SR compartments, $j_{tr}$

$$j_{tr} = ([Ca^{2+}]_{nSR} - [Ca^{2+}]_{jSR})/\tau_{diftr}$$

#### 1.4.5. Natural calcium buffering

$$\begin{aligned}
df_{TC} &= f_{kl} \cdot [Ca^{2+}]_i \cdot (1 - A - TT) - k_l \cdot (A + TT) \\
df_{TMC} &= k_{fTMC} \cdot [Ca^{2+}]_i \cdot (1 - f_{TMC} - f_{TMM}) - k_{bTMC} \cdot f_{TMC} \\
df_{TMM} &= k_{fTMM} \cdot [Mg^{2+}]_i \cdot (1 - f_{TMC} - f_{TMM}) - k_{bTMM} \cdot f_{TMM} \\
df_{CMi} &= k_{fCM} \cdot [Ca^{2+}]_i \cdot (1 - f_{CMi}) - k_{bCM} \cdot f_{CMi} \\
df_{CMs} &= k_{fCM} \cdot [Ca^{2+}]_{sub} \cdot (1 - f_{CMs}) - k_{bCM} \cdot f_{CMs} \\
df_{CQ} &= k_{fCQ} \cdot [Ca^{2+}]_{jSR} \cdot (1 - f_{CQ}) - k_{bCQ} \cdot f_{CQ}
\end{aligned}$$

#### 1.4.6. Dynamics of calcium concentrations in cell compartments

$$\begin{aligned}
d[Ca^{2+}]_i/dt &= (j_{Caddiff} \cdot V_{sub} - j_{up} \cdot V_{nSR})/V_i - (CM_{tot} \cdot (df_{CMi}/dt) + TC_{tot} \cdot (df_{TC}/dt) \\
&\quad + TMC_{tot} \cdot (df_{TMC}/dt)) \\
d[Ca^{2+}]_{sub}/d &= (-I_{CaL} + I_{CaT} + I_{bCa} - 2 \cdot I_{NCX})/(2 \cdot F/1000) + j_{SRCarel} \cdot V_{jSR}/V_{sub} - j_{Caddiff} \\
&\quad - CM_{tot} \cdot df_{CMs} \\
d[Ca^{2+}]_{jSR}/dt &= j_{tr} - j_{SRCarel} - CQ_{tot} \cdot df_{CQ} \\
d[Ca^{2+}]_{nSR}/dt &= j_{up} - j_{tr} \cdot V_{jSR}/V_{nSR} \\
Force & \\
dSL/dt &= -V_e
\end{aligned}$$

$$\begin{aligned}
N_{XB} &= (SL - SL_0) \cdot N_c \cdot (TT - U) \cdot 1000/2 \\
K_{Ca} &= F_{ko} + F_{kl} \cdot N_{XB}^{FN} / (F_{k,0.5}^{FN} + N_{XB}^{FN}) \\
k_{-1} &= F_{kl} / K_{Ca} \\
dA/dt &= F_{kl} \cdot [Ca^{2+}]_i \cdot (1 - A - TT - U) - A \cdot (F_f + k_{-1}) + TT \cdot (F_{go} - F_{gl} \cdot V_e) \\
dT/dt &= F_f \cdot A - TT \cdot (F_{go} + F_{gl} \cdot V_e + k_{-1}) + F_{kl} \cdot [Ca^{2+}]_i \cdot U \\
dU/dt &= k_{-1} \cdot TT - (F_{go} + F_{gl} \cdot V_e + F_{kl} \cdot [Ca^{2+}]_i) \cdot U \\
dV_e/dt &= 0. \\
ATP-ADP &
\end{aligned}$$

$$ATP_i = ATP_{i,max} \cdot \left( \frac{k_{ATP} \cdot \left( \frac{[100 \cdot cAMP]}{cAMPb} \right)^{n_{ATP}}}{k_{ATP,0.5} + \left( \frac{[100 \cdot cAMP]}{cAMPb} \right)^{n_{ATP}}} - K_{ATP,min} \right) / 100$$

**Table S1.** Initial model variables

|    | Model Parameter          | Value         | Units | Definition                                                                                    |
|----|--------------------------|---------------|-------|-----------------------------------------------------------------------------------------------|
| 1  | <b>V<sub>m</sub></b>     | -64.521628694 | mV    | Membrane potential                                                                            |
| 2  | <b>q<sub>a</sub></b>     | 0.6246780312  |       | Activation gating variable of I <sub>st</sub> 1                                               |
| 3  | <b>q<sub>i</sub></b>     | 0.4537033169  |       | Inactivation gating variable of I <sub>st</sub>                                               |
| 4  | <b>d<sub>T</sub></b>     | 0.0016256324  |       | Inactivation gate of I <sub>CaT</sub> 2                                                       |
| 5  | <b>f<sub>T</sub></b>     | 0.4264459666  |       | Activation gate of I <sub>CaT</sub>                                                           |
| 6  | <b>p<sub>a</sub></b>     | 0.4043600437  |       | Activation gating variable of I <sub>Kr</sub> 3                                               |
| 7  | <b>p<sub>i</sub></b>     | 0.9250035423  |       | Inactivation gating variable of I <sub>Kr</sub>                                               |
| 8  | <b>x<sub>s</sub></b>     | 0.0127086259  |       | Activation gating variable of I <sub>Ks</sub> 4                                               |
| 9  | <b>f<sub>L,1.2</sub></b> | 0.9968141226  |       | Inactivation gate for I <sub>CaL,1.2</sub> 5                                                  |
| 10 | <b>d<sub>L,1.2</sub></b> | 0.0000045583  |       | Activation gate for I <sub>CaL,1.2</sub>                                                      |
| 11 | <b>f<sub>L,1.3</sub></b> | 0.9809298233  |       | Inactivation gate for I <sub>CaL,1.3</sub>                                                    |
| 12 | <b>d<sub>L,1.3</sub></b> | 0.0002036671  |       | Activation gate for I <sub>CaL,1.3</sub>                                                      |
| 13 | <b>f<sub>Ca</sub></b>    | 0.7649576191  |       | Ca2+-dependent inactivation gating variable for I <sub>CaL,1.2</sub> and I <sub>CaL,1.2</sub> |
| 14 | <b>r</b>                 | 0.0046263658  |       | Activation gating variable of I <sub>to</sub> 6 and I <sub>sus</sub> 7                        |
| 15 | <b>q</b>                 | 0.6107148187  |       | Inactivation gating variable of I <sub>to</sub>                                               |
| 16 | <b>m<sub>1.5</sub></b>   | 0.4014088304  |       | Activation gating variable of Nav1.58                                                         |
| 17 | <b>h<sub>1.5</sub></b>   | 0.2724817537  |       | Fast inactivation gating variable of Nav1.5                                                   |
| 18 | <b>j<sub>1.5</sub></b>   | 0.0249208708  |       | Slow inactivation gating variable of Nav1.5                                                   |
| 19 | <b>m<sub>1.1</sub></b>   | 0.1079085266  |       | Activation gating variable of Nav1.1                                                          |
| 20 | <b>h<sub>1.1</sub></b>   | 0.4500098710  |       | Fast inactivation gating variable of Nav1.1                                                   |

<sup>1</sup> I<sub>st</sub> – sustained inward current

<sup>2</sup> I<sub>CaT</sub> – T-type Ca<sup>2+</sup> current

<sup>3</sup> I<sub>Kr</sub> – rapid potassium current

<sup>4</sup> I<sub>Ks</sub> – slow potassium current

<sup>5</sup> I<sub>CaL</sub> – L-type Ca<sup>2+</sup> current

<sup>6</sup> I<sub>to</sub> – transient potassium current

<sup>7</sup> I<sub>sus</sub> – sustained potassium current

<sup>8</sup> Nav# voltage-gated sodium channel

|    |                                        |              |                  |                                                                                                |
|----|----------------------------------------|--------------|------------------|------------------------------------------------------------------------------------------------|
| 21 | <b>j<sub>1.1</sub></b>                 | 0.0268486392 |                  | Slow inactivation gating variable of Nav1.1                                                    |
| 22 | <b>y</b>                               | 0.0279984462 |                  | Activation gating variable of I <sub>f9</sub>                                                  |
| 23 | <b>[Ca<sup>2+</sup>]<sub>i</sub></b>   | 0.0000319121 | mM               | Intracellular Ca <sup>2+</sup> concentration or Ca <sup>2+</sup> concentration in the cytosol  |
| 24 | <b>[Ca<sup>2+</sup>]<sub>JSR</sub></b> | 0.1187281829 | mM               | Ca <sup>2+</sup> concentration in the JSR10                                                    |
| 25 | <b>[Ca<sup>2+</sup>]<sub>NSR</sub></b> | 1.5768287365 | mM               | Ca <sup>2+</sup> concentration in the NSR11                                                    |
| 26 | <b>[Ca<sup>2+</sup>]<sub>sub</sub></b> | 0.0000560497 | mM               | Ca <sup>2+</sup> concentration in the subspace                                                 |
| 27 | <b>f<sub>TC</sub></b>                  | 0.0063427103 |                  | Fractional occupancy of the troponin Ca <sup>2+</sup> site by [Ca <sup>2+</sup> ] <sub>i</sub> |
| 28 | <b>f<sub>TMC</sub></b>                 | 0.1296677919 |                  | Fractional occupancy of the troponin Mg <sup>2+</sup> site by [Ca <sup>2+</sup> ] <sub>i</sub> |
| 29 | <b>f<sub>TMM</sub></b>                 | 0.7688656371 |                  | Fractional occupancy of the troponin Mg <sup>2+</sup> site by Mg <sup>2+</sup>                 |
| 30 | <b>f<sub>CMS</sub></b>                 | 0.0242054739 |                  | Fractional occupancy of calmodulin by [Ca <sup>2+</sup> ] <sub>sub</sub>                       |
| 31 | <b>f<sub>CMi</sub></b>                 | 0.0138533048 |                  | Fractional occupancy of calmodulin by [Ca <sup>2+</sup> ] <sub>i</sub>                         |
| 32 | <b>f<sub>CQ</sub></b>                  | 0.1203184861 |                  | Fractional occupancy of calsequestrin by [Ca <sup>2+</sup> ] <sub>rel</sub>                    |
| 33 | <b>R</b>                               | 0.7720290515 |                  | Fraction of reactivated (closed) RyR channels                                                  |
| 34 | <b>OO</b>                              | 0.0000000760 |                  | Open-state fraction of RyR channels                                                            |
| 35 | <b>S</b>                               | 0.0000000213 |                  | Inactive-state fraction of RyR channels                                                        |
| 36 | <b>RI</b>                              | 0.2162168926 |                  | Inactive-state fraction of RyR channels                                                        |
| 37 | <b>w</b>                               | 0.0004       |                  | IKACH12 and voltage-dependent gating variable                                                  |
| 38 | <b>[cAMP]</b>                          | 19.73        | Pmol /mg protein | cAMP13 level                                                                                   |
| 39 | <b>[PLB]</b>                           | 0.23         |                  | PLB14 phosphorylation level                                                                    |
| 40 | <b>A</b>                               | 0.06         |                  | The density of regulatory units with bound Ca <sup>2+</sup> and adjacent weak cross-bridge     |
| 41 | <b>TT</b>                              | 0.02         |                  | The density of regulatory units with bound Ca <sup>2+</sup> and adjacent strong cross-bridge   |
| 42 | <b>U</b>                               | 0.06         |                  | The density of regulatory units without bound but with adjacent strong cross-bridge            |
| 43 | <b>SL</b>                              | 1.75e-6      | μm               | Sarcomere length                                                                               |

<sup>9</sup> I<sub>f</sub> – HCN4 (“funny”) current

<sup>10</sup> JSR – junctional sarcoplasmic reticulum

<sup>11</sup> NSR – network sarcoplasmic reticulum

<sup>12</sup> I<sub>KACH</sub> – acetylcholine-activated potassium current

<sup>13</sup> cAMP – cyclic adenosine monophosphate

<sup>14</sup> PLB - phospholamban

Table S2. Model constants

| Parameter                                                                   | Value              | Units   | Definition                                                                                             |
|-----------------------------------------------------------------------------|--------------------|---------|--------------------------------------------------------------------------------------------------------|
| <b>Ion concentrations</b>                                                   |                    |         |                                                                                                        |
| $[\text{Mg}^{2+}]_i$                                                        | 2.5                | mM      | Intracellular $\text{Mg}^{2+}$                                                                         |
| $[\text{Na}^+]_o$                                                           | 140                | mM      | Extracellular $\text{Na}^+$                                                                            |
| $[\text{Ca}^{2+}]_o$                                                        | 2                  | mM      | Extracellular $\text{Ca}^{2+}$                                                                         |
| $[\text{K}^+]_o$                                                            | 5.4                | mM      | Extracellular $\text{K}^+$                                                                             |
| $[\text{Na}^+]_i$                                                           | 10                 | mM      | Intracellular $\text{Na}^+$                                                                            |
| $[\text{K}^+]_i$                                                            | 139.885460306<br>6 | mM      | Intracellular $\text{K}^+$                                                                             |
| <b>Cell compartments</b>                                                    |                    |         |                                                                                                        |
| <b>C</b>                                                                    | 25                 | pF      | Cell electric capacitance                                                                              |
| $V_{\text{cell}}$                                                           | 3                  | pL      | Cell volume                                                                                            |
| $V_{\text{sub}}$                                                            | 0.03328117         | pL      | Subspace volume                                                                                        |
| $V_{\text{JSR}}$                                                            | 0.0036             | pL      | JSR volume                                                                                             |
| $V_i$                                                                       | 1.34671883         | pL      | Myoplasmic volume                                                                                      |
| $V_{\text{nSR}}$                                                            | 0.0348             | pL      | NSR volume ( $\text{Ca}^{2+}$ uptake store)                                                            |
| <b>F</b>                                                                    | 96485              | C/M     | Faraday constant                                                                                       |
| <b>T</b>                                                                    | 310.5              | K       | Temperature (37°C)                                                                                     |
| <b>R</b>                                                                    | 8.314472           | J/(M K) | Universal gas constant                                                                                 |
| $E_{\text{st}}$                                                             | 17                 | mV      | Apparent reversal potential of $I_{\text{st}}$                                                         |
| $E_{\text{CaL}}$                                                            | 47                 | mV      | Reversal potential of $I_{\text{CaL}}$                                                                 |
| $E_{\text{Na15}}$                                                           | 41.5761            | mV      | Reversal potential of $I_{\text{Na15}}$                                                                |
| $E_{\text{CaT}}$                                                            | 45                 | mV      | Reversal potential of $I_{\text{CaT}}$                                                                 |
| $E_{\text{T}}$                                                              | 1000·(R·T/F)       | mV      | Constant                                                                                               |
| <b><math>\text{Na}^+/\text{Ca}^{2+}</math> exchanger current parameters</b> |                    |         |                                                                                                        |
| $K_{1ni}$                                                                   | 395.3              | mM      | Dissociation constant for $[\text{Na}^+]_i$ binding to first site on $I_{\text{NCX}}^{15}$ transporter |
| $K_{1no}$                                                                   | 1628               | mM      | Dissociation constant for $[\text{Na}^+]_o$ binding to first site on $I_{\text{NCX}}$ transporter      |
| $K_{2ni}$                                                                   | 2.289              | mM      | Dissociation constant for $[\text{Na}^+]_i$ binding to second site on $I_{\text{NCX}}$ transporter     |
| $K_{2no}$                                                                   | 561.4              | mM      | Dissociation constant for $[\text{Na}^+]_o$ binding to second site on $I_{\text{NCX}}$ transporter     |

<sup>15</sup>  $I_{\text{NCX}}$  – sodium-calcium exchanger current

|           |        |    |                                                                                                         |
|-----------|--------|----|---------------------------------------------------------------------------------------------------------|
| $K_{3ni}$ | 26.44  | mM | Dissociation constant for $[Na^+]_i$ binding to third site on $I_{NCX}$ transporter                     |
| $K_{3no}$ | 4.663  | mM | Dissociation constant for $[Na^+]_o$ binding to third site on $I_{NCX}$ transporter                     |
| $K_{ci}$  | 0.0207 | mM | Dissociation constant for $[Ca^{2+}]_i$ binding to $I_{NCX}$ transporter                                |
| $K_{co}$  | 3.663  | mM | Dissociation constant for $[Ca^{2+}]_o$ binding to $I_{NCX}$ transporter                                |
| $K_{cni}$ | 26.44  | mM | Dissociation constant for simultaneous $[Na^+]_i$ and $[Ca^{2+}]_i$ binding to $I_{NCX}$ transporter    |
| $Q_{ci}$  | 0.1369 |    | Fractional charge movement during the $[Ca^{2+}]_{sub}$ occlusion reaction of the $I_{NCX}$ transporter |
| $Q_{co}$  | 0      |    | Fractional charge movement during the $[Ca^{2+}]_o$ occlusion reaction of the $I_{NCX}$ transporter     |
| $Q_n$     | 0.4315 |    | Fractional charge movement during $Na^+$ occlusion reactions of the $I_{NCX}$ transporter               |

| <b>Ca<sup>2+</sup> flux parameters</b> |         |                         |                                                                       |
|----------------------------------------|---------|-------------------------|-----------------------------------------------------------------------|
| $\tau_{difCa}$                         | 0.04    | ms                      | Time constant of $Ca^{2+}$ diffusion from the submembrane to myoplasm |
| $TC_{tot}$                             | 0.031   | mM                      | Total concentration of $Ca^{2+}$ bound to troponin                    |
| $TMC_{tot}$                            | 0.062   | mM                      | Total concentration of $Mg^{2+}$ bound to troponin                    |
| $k_{fTC}$                              | 88.8    | $mM^{-1} \cdot ms^{-1}$ | $Ca^{2+}$ association constant of troponin                            |
| $k_{fTMC}$                             | 237.7   | $mM^{-1} \cdot ms^{-1}$ | $Ca^{2+}$ association constant of the troponin- $Mg^{2+}$ site        |
| $k_{bTC}$                              | 0.446   | $ms^{-1}$               | $Ca^{2+}$ dissociation constant of the troponin- $Ca^{2+}$ site       |
| $k_{bTMC}$                             | 0.00751 | $ms^{-1}$               | $Ca^{2+}$ dissociation constant of the troponin- $Mg^{2+}$ site       |
| $k_{fTMM}$                             | 2.277   | $mM^{-1} \cdot ms^{-1}$ | $Mg^{2+}$ association constant of the troponin- $Mg^{2+}$ site        |
| $k_{bTMM}$                             | 0.751   | $ms^{-1}$               | $Mg^{2+}$ dissociation constant of the troponin- $Mg^{2+}$ site       |
| $CM_{tot}$                             | 0.045   | mM                      | Total calmodulin concentration                                        |
| $k_{fCM}$                              | 227.7   | $mM^{-1} \cdot ms^{-1}$ | $Ca^{2+}$ association constant of calsequestrin                       |
| $k_{bCM}$                              | 0.542   | $ms^{-1}$               | $Ca^{2+}$ dissociation constant of calmodulin                         |
| $CQ_{tot}$                             | 10      | mM                      | Total calsequestrin concentration                                     |
| $k_{fCQ}$                              | 0.534   | $mM^{-1} \cdot ms^{-1}$ | $Ca^{2+}$ association constant of calsequestrin                       |
| $k_{bCQ}$                              | 0.445   | 1/ms                    | Dissociation constant of calsequestrin                                |



|                            |         |                         |                                                                            |
|----------------------------|---------|-------------------------|----------------------------------------------------------------------------|
| $k_{oCa_{max}}$            | 10      | $1/(mM^2 \cdot ms)$     | RyR non-SR-dependent transition rate constant                              |
| $k_{om}$                   | 0.06    | $ms^{-1}$               | RyR rate transition constant                                               |
| $k_{iCa}$                  | 0.5     | $mM^{-1} \cdot ms^{-1}$ | RyR $Ca^{2+}$ -dependent inactivation rate                                 |
| $k_{im}$                   | 0.005   | $ms^{-1}$               | RyR rate transition constant                                               |
| $RyR_{min}$                | 0.0127  |                         | RyR modeling parameter                                                     |
| $RyR_{max}$                | 0.02    |                         | RyR modeling parameter                                                     |
| $n_{RyR}$                  | 9.773   |                         | RyR Hill equation coefficient                                              |
| $k_{05Ry}$                 | 0.7     |                         | RyR Hill equation coefficient                                              |
| $EC_{50SR}$                | 0.45    | $mM$                    | EC50 of $Ca^{2+}$ SR-dependent activation of SR $Ca^{2+}$ release          |
| $MaxSR$                    | 15      |                         | $Ca^{2+}$ modeling parameter                                               |
| $MinSR$                    | 1       |                         | $Ca^{2+}$ modeling parameter                                               |
| $HSR$                      | 2.5     |                         | Parameter for $Ca^{2+}$ -dependent activation of SR $Ca^{2+}$ release      |
| $n_{up}$                   | 2       |                         | SR $Ca^{2+}$ uptake and Hill coefficient                                   |
| $P_{up}$                   | 0.02    | $mM/ms$                 | Rate constant for $Ca^{2+}$ uptake by the $Ca^{2+}$ pump in the network SR |
| $k_s$                      | 250e3   | $ms^{-1}$               | $Ca^{2+}$ release rate parameter                                           |
| $K_{mf}$                   | 0.00008 | $mM$                    | Forward-mode $Ca^{2+}$ affinity of the SER- $CA^{16}$ pump                 |
| $K_{mr}$                   | 4.5     | $mM$                    | Reverse-mode $Ca^{2+}$ affinity of the SERCA pump                          |
| $\tau_{tr}$                | 40      | $ms$                    | Time constant for $Ca^{2+}$ transport from the network to junctional SR    |
| $K_{up}$                   | 0.0006  | $mM$                    | Half-maximal $[Ca^{2+}]_i$ for $Ca^{2+}$ uptake in the NSR                 |
| $K_{mfCa}$                 | 0.00035 | $mM$                    | Dissociation constant of $Ca^{2+}$ -dependent inactivation of $I_{CaL}$    |
| $\alpha_{fCa}$             | 0.021   | $ms^{-1}$               | $Ca^{2+}$ dissociation rate constant for $I_{CaL}$                         |
| <b>Membrane parameters</b> |         |                         |                                                                            |
| $g_{sus}$                  | 0.0156  | $nS/pF$                 | Normalized conductance of $I_{sus}$ channels                               |
| $g_{st}$                   | 2.4e-7  | $nS/pF$                 | Normalized conductance of $I_{st}$ channels                                |
| $g_{bNa}$                  | 0.0049  | $nS/pF$                 | Normalized conductance of $I_{bNa}^{17}$ channels                          |
| $g_{K1}$                   | 0.0323  | $nS/pF$                 | Normalized conductance of $I_{K1}^{18}$ channels                           |
| $g_{Ks}$                   | 0.012   | $nS/pF$                 | Normalized conductance of $I_{Ks}$ channels                                |

<sup>16</sup> SERCA - SR  $Ca^{2+}$ -ATPase

<sup>17</sup>  $I_{bNa}$  - sodium-dependent background current

<sup>18</sup>  $I_{K1}$  – inward rectifier potassium current

|                                         |          |                    |                                                             |
|-----------------------------------------|----------|--------------------|-------------------------------------------------------------|
| $g_{Na15}$                              | 0.000237 | nS/pF              | Normalized conductance of $I_{Na15}$ <sup>19</sup> channels |
| $g_{Na11}$                              | 0.000237 | nS/pF              | Normalized conductance of $I_{Na11}$ channels               |
| $g_{CaL12}$                             | 0.2832   | nS/pF              | Normalized conductance of $I_{Na12}$ channels               |
| $g_{CaL13}$                             | 0.9936   | nS/pF              | Normalized conductance of $I_{Na13}$ channels               |
| $g_{CaT}$                               | 0.5600   | nS/pF              | Normalized conductance of $I_{CaT}$ channels                |
| $g_{If}$                                | 0.228    | nS/pF              | Normalized conductance of $I_{If}$ channels                 |
| $g_{Kr}$                                | 0.0960   | nS/pF              | Normalized conductance of $I_{Kr}$ channels                 |
| $g_{to}$                                | 0.1968   | nS/pF              | Normalized conductance of $I_{to}$ channels                 |
| $K_{NaCa}$                              | 220      | pA/pF              | Scaling factor for $I_{NCX}$                                |
| $g_{bCa}$                               | 0.0006   | nS/pF              | Normalized conductance of $I_{bCa}$ <sup>20</sup> channels  |
| $g_{bK}$                                | 0.0001   | nS/pF              | Normalized conductance of $I_{bK}$ <sup>21</sup> channels   |
| $I_{NaKmax}$                            | 5.698    | pA/pF              | Maximal $I_{NaK}$ <sup>22</sup> conductance                 |
| $K_{mNa}$                               | 14       | mM                 | Half-maximal $[Na^+]_i$ of $I_{NaK}$                        |
| $K_{mK}$                                | 1.4      | mM                 | Half-maximal $[K^+]_o$ of $I_{NaK}$                         |
| <b>AC-cAMP/PKA signaling parameters</b> |          |                    |                                                             |
| $K_{AC,I}$                              | 0.016    | 1/min              | Non- $Ca^{2+}$ AC <sup>23</sup> activity                    |
| $K_{AC}$                                | 0.0735   | 1/min              | Non- $Ca^{2+}$ AC activation                                |
| $K_{Ca}$                                | 0.000178 | mM                 | Maximal $Ca^{2+}$ AC activation                             |
| $K_{AC,Ca}$                             | 0.000024 | mM                 | Half-maximal $Ca^{2+}$ AC activation                        |
| $k_{PKA}$                               | 9000     | Pmol /protein /min | Maximal PKA <sup>24</sup> activity                          |
| $k_{PKA,cAMP}$                          | 284.5    | Pmol /protein      | Half-maximal PKA activation                                 |
| $n_{PKA}$                               | 5        |                    | Hill coefficient                                            |
| <b>Phosphorylation parameters</b>       |          |                    |                                                             |
| $k_{PLBp}$                              | 52.25    | 1/min              | Maximal PLB phosphorylation                                 |
| $n_{PLB}$                               | 1        |                    | Hill coefficient                                            |
| $k_{PKA,PLB}$                           | 1.651    |                    | Half-maximal PLB phosphorylation                            |
| $[PP1]$                                 | 0.89     | $\mu M$            | PP1 <sup>25</sup> concentration                             |
| $k_{PP1}$                               | 23.575   | 1/ $\mu M$ /min    | Maximal PP1 activity                                        |
| $K_{PP1,PLB}$                           | 0.06967  |                    | Half-maximal PP1 activity                                   |

<sup>19</sup>  $I_{Na15}$  – sodium current

<sup>20</sup>  $I_{bCa}$  - calcium-dependent background current

<sup>21</sup>  $I_{bK}$  - potassium-dependent background current

<sup>22</sup>  $I_{NaK}$  – sodium-potassium pump current

<sup>23</sup> AC –Adenylyl cyclase

<sup>24</sup> PKA – protein kinase A

<sup>25</sup> PP1 - protein phosphatase 1

| Force parameters           |                     |                   |                                                                                                                             |
|----------------------------|---------------------|-------------------|-----------------------------------------------------------------------------------------------------------------------------|
| <b>SL<sub>0</sub></b>      | 0.8                 | μm                | A constant coefficient that describes the effect of the actin and myosin filament lengths on the single overlap length      |
| <b>N<sub>c</sub></b>       | 2*10 <sup>13</sup>  | 1/mm <sup>2</sup> | The SAN cross-section area                                                                                                  |
| <b>F<sub>k0</sub></b>      | 350                 | 1/mM              | The cross-bridge independent coefficient of calcium                                                                         |
| <b>FN</b>                  |                     | 3.5               | Hill coefficient                                                                                                            |
| <b>F<sub>k,0.5</sub></b>   | 2.5*10 <sup>9</sup> | 1/mm <sup>3</sup> | Half-maximal cross-bridge Ca <sup>2+</sup> affinity                                                                         |
| <b>F<sub>kl</sub></b>      | 60                  | 1 /mM /ms         | The rate constant of calcium binding to troponin                                                                            |
| <b>F<sub>f</sub></b>       | 0.04                | 1/ms              | The cross-bridge turnover rate from the weak to the strong conformation                                                     |
| <b>F<sub>g0</sub></b>      | 0.03                | 1/ms              | The cross-bridge weakening rate in the isometric regime                                                                     |
| <b>F<sub>gl</sub></b>      | 4.4*10 <sup>6</sup> | 1/m               | The mechanical-feedback coefficient, describes the dependence of the cross-bridge weakening rate on the shortening velocity |
| <b>F<sub>xb</sub></b>      | 2*10 <sup>-9</sup>  | mN                | The unitary force per cross-bridge in the isometric regime                                                                  |
| ATP parameters             |                     |                   |                                                                                                                             |
| <b>ATP<sub>i,max</sub></b> | 2.533               | mM                |                                                                                                                             |
| <b>k<sub>ATP</sub></b>     | 61420               |                   |                                                                                                                             |
| <b>k<sub>ATP,0.5</sub></b> | 6724                |                   |                                                                                                                             |
| <b>cAMP<sub>b</sub></b>    | 20                  |                   | Baseline cAMP concentration                                                                                                 |
| <b>K<sub>ATP,min</sub></b> | 6034                |                   |                                                                                                                             |
| <b>n<sub>ATP</sub></b>     | 3.36                |                   |                                                                                                                             |

## References

1. Arbel-Ganon, L.; Behar, J.A.; Gómez, A.M.; Yaniv, Y. Distinct Mechanisms Mediate Pacemaker Dysfunction Associated with Catecholaminergic Polymorphic Ventricular Tachycardia Mutations: Insights from Computational Modeling. *J. Mol. Cell. Cardiol.* **2020**, *143*, 85–95, doi:10.1016/j.yjmcc.2020.04.017.
2. Kharche, S.; Yu, J.; Lei, M.; Zhang, H. A Mathematical Model of Action Potentials of Mouse Sinoatrial Node Cells with Molecular Bases. *AJP Hear. Circ. Physiol.* **2011**, *301*, H945–H963, doi:10.1152/ajpheart.00143.2010.
3. Kurata, Y.; Hisatome, I.; Imanishi, S.; Shibamoto, T. Dynamical Description of Sinoatrial Node Pacemaking: Improved Mathematical Model for Primary Pacemaker Cell. *Am. J. Physiol. - Hear. Circ. Physiol.* **2002**, *283*, doi:10.1152/ajpheart.00900.2001.
4. Saucerman, J.J.; Brunton, L.L.; Michailova, A.P.; McCulloch, A.D. Modeling β-Adrenergic Control of Cardiac Myocyte Contractility in Silico. *J. Biol. Chem.* **2003**, *278*, 47997–48003, doi:10.1074/jbc.M308362200.
5. Demir, S.S.; Clark, J.W.; Giles, W.R. Parasympathetic Modulation of Sinoatrial Node Pacemaker Activity in Rabbit Heart: A Unifying Model. *Am. J. Physiol. - Hear. Circ. Physiol.* **1999**, *276*, doi:10.1152/ajpheart.1999.276.6.h2221.
6. Maltsev, V.A.; Lakatta, E.G. A Novel Quantitative Explanation for the Autonomic Modulation of Cardiac

Pacemaker Cell Automaticity via a Dynamic System of Sarcolemmal and Intracellular Proteins. *Am. J. Physiol. Circ. Physiol.* **2010**, 298, H2010–H2023, doi:10.1152/ajpheart.00783.2009.

7. Luo, C.; Rudy, Y. A Dynamic Model of the Cardiac Ventricular Action Potential. I. Simulations of Ionic Currents and Concentration Changes. *Circ. Res.* **1994**, 74, 1071–1096.
8. Yaniv, Y.; Sivan, R.; Landesberg, A. Analysis of Hystereses in Force Length and Force Calcium Relations. *Am. J. Physiol. Circ. Physiol.* **2005**, 288, H389–H399.
9. Catanzaro, J.N.; Nett, M.P.; Rota, M.; Vassalle, M. On the Mechanisms Underlying Diastolic Voltage Oscillations in the Sinoatrial Node. *J. Electrocardiol.* **2006**, 39, 342, doi:10.1016/j.jelectrocard.2006.03.006.
10. Yaniv, Y.; Ganesan, A.; Yang, D.; Ziman, B.D.; Lyashkov, A.E.; Levchenko, A.; Zhang, J.; Lakatta, E.G. Real-Time Relationship between PKA Biochemical Signal Network Dynamics and Increased Action Potential Firing Rate in Heart Pacemaker Cells: Kinetics of PKA Activation in Heart Pacemaker Cells. *J. Mol. Cell. Cardiol.* **2015**, 86, 168–178, doi:10.1016/j.yjmcc.2015.07.024.
11. Behar, J.; Yaniv, Y. Age-Related Pacemaker Deterioration Is Due to Impaired Intracellular and Membrane Mechanisms: Insights from Numerical Modeling. *J. Gen. Physiol.* **2017**, 149, 935–949, doi:10.1085/jgp.201711792.
